# Supplementary material
Source: PubMed Central journal article supplement (PMC4713353)
Supplement: NIHMS742247-supplement-Supplemental_Figure_1.pdf [file NIHMS742247-supplement-Supplemental_Figure_1.pdf]

Supplemental Figure 1

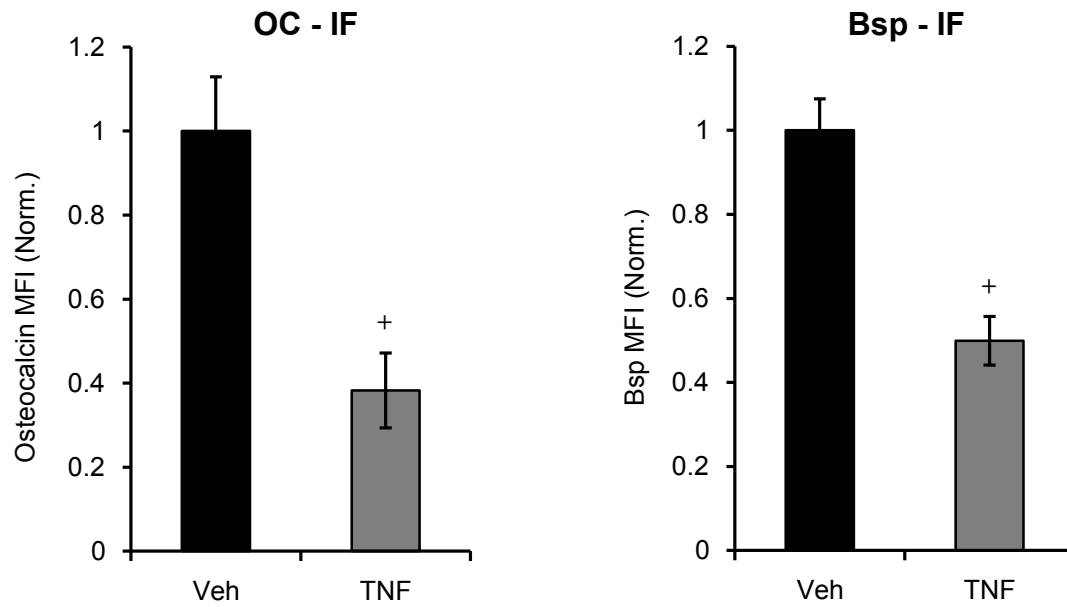

**Supplemental Figure 1:**

**TNF $\alpha$  decreased the expression of bone matrix proteins.**

MC3T3 cells were stimulated with TNF $\alpha$ . Protein expression of Bsp and osteocalcin was measured by immunofluorescence and analyzed as mean fluorescence intensity (MFI). Data shown are representative of 3 independent experiments. +, significant inhibition with TNF $\alpha$ . (P<0.05).
