# Supplementary material
Source: PubMed Central journal article supplement (PMC4713353)
Supplement: NIHMS742247-supplement-Supplemental_Figure_2.pdf [file NIHMS742247-supplement-Supplemental_Figure_2.pdf]

Supplemental Figure 2

**A Mutations of NF- $\kappa$ B binding sites on osteocalcin promoter**

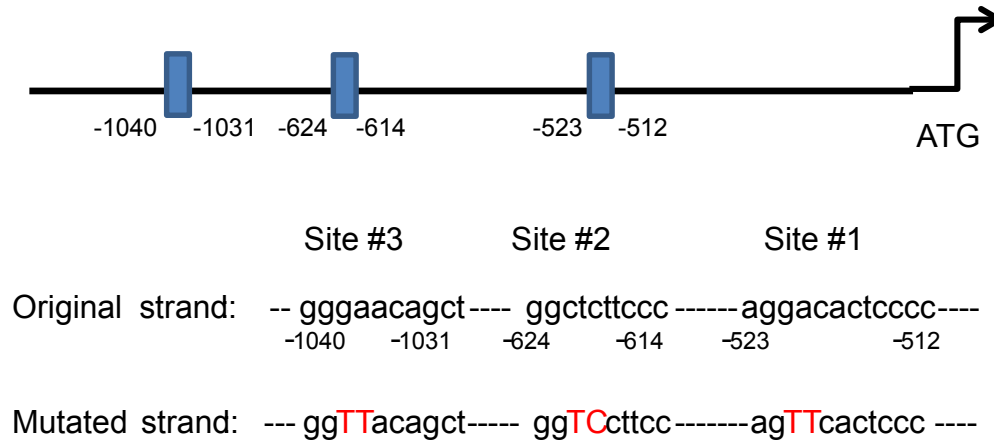

**B Mutations of NF- $\kappa$ B binding sites on Bsp promoter**

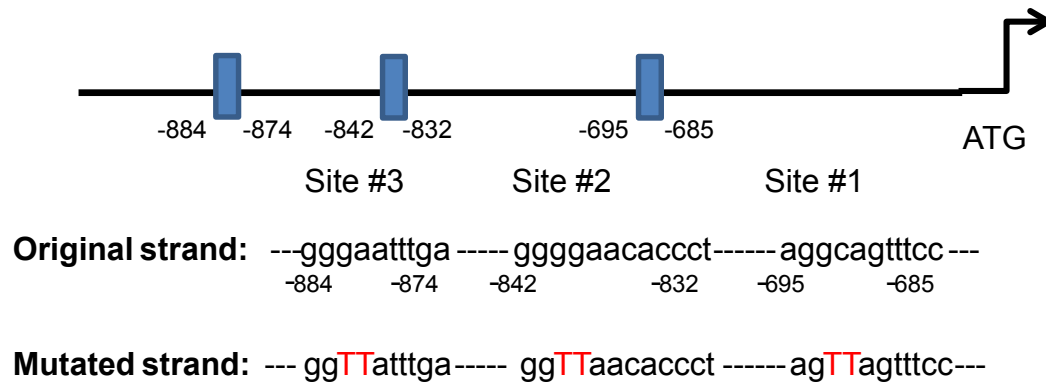

**Supplemental Figure 2:**

**Schematic representation of in situ mutagenesis carried out on promoter region of osteocalcin and Bsp.**

3 putative NF- $\kappa$ B binding sites (blue boxes) were identified and mutated as indicated. The mutated constructs were used for subsequent experiments as described in materials & methods.
